# Supplementary material for: CLCC1 c. 75C>A Mutation in Pakistani Derived Retinitis Pigmentosa Families Likely Originated With a Single Founder Mutation 2,000–5,000 Years Ago
Source: Front Genet. 2022 Mar 22;13:804924. doi: 10.3389/fgene.2022.804924 (PMC8980549; doi:10.3389/fgene.2022.804924)
Supplement: Supplementary file 1 [file Table2.XLSX]

## Sheet: Sheet1
Proximal SNP	rs12403629	rs345292	rs17020437	rs12034547	rs1333130	g.108950376 G>T	rs587727	rs17014495	rs1229350	rs11102121
Samples with Shared Haplotype	4	6	8	10	14	18	16	12	6	2
Fn (EM)	0.01042	0.01042	0.124891	0.16613	0.01042		0.57753	0.01042	0.01238	0.22394
Fn (CHM)	0.01042	0.01042	0.0651042	0.09782	0.01042		0.51823	0.01042	0.00977	0.22656
Theta	0.0124168	0.0106793	0.0100887	0.008577	0.00129751	0	0.0019229	0.0022142	0.0082845	0.01522
SNPs in Collapsed Haplotype	10	13	6	8	24	9	2	17	4	2
Pr (EM)	0.067812	0.00134	0.26401	0.16613	0.00027		0.1991	0.0001	0.08626	0.51046
Pr (CHM)	0.067812	0.00023	0.27172	0.17319	0.00027		0.31771	0.0001	0.14123	0.50521
Est Mut Age (Goldstein et al., EM)	123 (108-143)	104 (90-120)	99 (84-116)	88 (73-106)	196 (152-243)		159 (104-219)	185 (151-220)	135 (109-167)	N/A
Est Mut Age (Goldstein et al., CHM)	123 (108-143)	104 (90-120)	89 (76-104)	79 (66-93)	196 (152-243)		136 (90-187)	185 (151-220)	134 (109-167)	N/A
Est Mut Age (Risch et al., EM)	123 (108-143)	104 (91-120)	99 (84-118)	88 (73-106)	196 (152-243)		159 (104-219)	185 (151-222)	135 (109-168)	126 (108-149)
Est Mut Age (Risch et al., CHM)	123 (108-143)	104 (91-120)	89 (76-104)	79 (66-93)	196 (152-243)		136 (90-187)	185 (151-222)	134 (109-167)	124 (107-147)
Est Mut Age DMLE (1% pop growth)						309 (116-326)
Est Mut Age Gamma Ind						104.3 (75.1-145.0)
Est Mut Age Gamma Cor						99.4 (58.2-171.0)
Fn: estimated frequency of the risk haplotype in the general population, EM: expectation-maximization, CHM: composite haplotype method,
Pr: probability of a mutation reverting a nonrisk haplotype to the risk haplotype, Est Mut Age: estimated mutation age by methods described in Goldstein et al.
or Risch et al., Gamma Ind: estimation from segment lengths assuming an independent' genealogy, Gamma Cor: Assuming a correlated genealogy
